# Supplementary material for: An Organizational Perspective on Patenting and Open Innovation
Source: Atypon-hosted journal article supplement (doi:10.1287/orsc.2014.0911), 2014-05-12
Supplement: orsc.2014.0911-sm-hegde_online_appendix.pdf [file orsc.2014.0911-sm-hegde_online_appendix.pdf]

## An Organizational Perspective on Patenting and Open Innovation

Ajay Bhaskarabhatla and Deepak Hegde

### Online Supplementary Appendix

Table A1: Sample means for key variables, 1979-1998

| Year         | Patents |               | R&D expenses in M\$ |               | Plant & Equipment expenses in M\$ |               | Sales in M\$ |               |
|--------------|---------|---------------|---------------------|---------------|-----------------------------------|---------------|--------------|---------------|
|              | IBM     | Control group | IBM                 | Control group | IBM                               | Control group | IBM          | Control group |
| 1979         | 532     | 37.8          | 3,223.2             | 111.4         | 28,897.4                          | 3,887.6       | 54,184.8     | 3,377.1       |
| 1980         | 533     | 38.2          | 3,176.8             | 109.8         | 31,385.5                          | 3,561.3       | 54,785.2     | 3,203.7       |
| 1981         | 589     | 34.9          | 3,046.7             | 109.6         | 32,655.4                          | 3,253.1       | 54,942.3     | 2,956.6       |
| 1982         | 568     | 34.9          | 3,654.3             | 111.6         | 31,262.2                          | 3,034.1       | 61,167.9     | 2,802.5       |
| 1983         | 580     | 30.1          | 4,349.2             | 114.2         | 27,925.7                          | 2,628.2       | 69,511.4     | 2,635.0       |
| 1984         | 487     | 29.7          | 5,225.7             | 115.7         | 27,162.6                          | 1,071.2       | 76,255.4     | 1,864.6       |
| 1985         | 509     | 28.9          | 5,531.2             | 140.1         | 31,488.0                          | 1,323.1       | 80,089.6     | 2,371.1       |
| 1986         | 547     | 33.7          | 6,240.8             | 181.3         | 33,390.8                          | 1,449.7       | 80,462.5     | 2,897.1       |
| 1987         | 541     | 43.5          | 6,077.0             | 197.5         | 34,841.4                          | 1,438.3       | 82,409.8     | 3,084.2       |
| 1988         | 637     | 47.7          | 6,451.7             | 206.1         | 34,202.0                          | 1,404.2       | 87,134.3     | 3,217.9       |
| 1989         | 709     | 55.7          | 7,229.4             | 215.1         | 34,670.8                          | 1,423.4       | 87,166.9     | 3,220.8       |
| 1990         | 877     | 58.8          | 6,486.5             | 231.0         | 35,958.1                          | 1,512.1       | 91,103.8     | 3,487.0       |
| 1991         | 1,234   | 59.6          | 6,301.3             | 239.7         | 34,748.3                          | 1,521.8       | 81,637.9     | 3,436.8       |
| 1992         | 1,500   | 63.5          | 6,252.1             | 245.8         | 26,561.9                          | 1,545.7       | 79,363.3     | 3,557.2       |
| 1993         | 1,265   | 57.8          | 5,272.9             | 242.8         | 20,850.0                          | 1,470.8       | 74,632.1     | 3,575.8       |
| 1994         | 1,844   | 73.9          | 3,923.1             | 265.5         | 19,330.2                          | 1,628.3       | 74,300.3     | 4,120.3       |
| 1995         | 2,557   | 94.0          | 5,906.5             | 289.2         | 18,734.3                          | 1,336.1       | 81,292.2     | 4,374.8       |
| 1996         | 2,725   | 102.9         | 4,327.4             | 265.8         | 19,147.7                          | 1,327.6       | 83,541.7     | 4,191.5       |
| 1997         | 3,604   | 132.4         | 4,608.5             | 303.1         | 19,631.3                          | 1,466.2       | 84,003.6     | 4,463.5       |
| 1998         | 3,777   | 119.0         | 4,734.0             | 264.6         | 20,808.9                          | 1,387.0       | 86,567.0     | 3,907.8       |
| AVG(1979-98) | 1,280.8 | 58.4          | 5,100.9             | 199.7         | 28,182.6                          | 1,825.4       | 76,227.6     | 3,324.7       |

Table A1 Notes: The table shows sample means for the key variables of our study for IBM and the 114 control- group firms in the electronics and semiconductors industry. Column 2 shows the number of successful U.S. patent applications for the sample firms by the corresponding patent-application year. R&D expenses, Plant and Equipment expenses and Sales are in Millions of FY2000 dollars.

Table A2: Pairwise correlations among variables

| #  | Variable                | 1      | 2      | 3     | 4      | 5      | 6      | 7      | 8     | 9     |
|----|-------------------------|--------|--------|-------|--------|--------|--------|--------|-------|-------|
| 1  | N of Patents            | 1      |        |       |        |        |        |        |       |       |
| 2  | R&D not-zero            | 0.06*  | 1      |       |        |        |        |        |       |       |
| 3  | log (R&D/Sales)         | 0.02   | 0.27*  | 1     |        |        |        |        |       |       |
| 4  | log (P&E/Sales)         | 0.18*  | -0.01  | 0.22* | 1      |        |        |        |       |       |
| 5  | IBM                     | 0.51*  | 0.02   | -0.01 | 0.07*  | 1      |        |        |       |       |
| 6  | log Sales               | 0.55*  | 0.12*  | 0.06* | 0.32*  | 0.25*  | 1      |        |       |       |
| 7  | log Age                 | 0.16*  | 0.08*  | -0.04 | 0.07*  | 0.11*  | 0.33*  | 1      |       |       |
| 8  | Operating income change | -0.01  | -0.01  | -0.02 | 0.02   | 0.00   | 0.03   | -0.04  | 1     |       |
| 9  | N of years missing      | -0.15* | -0.12* | 0.09* | 0.11*  | -0.11* | -0.17* | -0.48* | 0.07* | 1     |
| 10 | Tobin's Q               | -0.01  | 0.00   | 0.16* | -0.11* | 0.00   | -0.04  | -0.23* | 0.03  | 0.12* |

Table A2 Notes: Pairwise correlations and significance; \* p<0.05

Table A3: PPML estimates of patent propensity for IBM and control-group firms, 1979-1998

| D.V.=N of Patents       | 1979-83             | 1984-88          | 1989-93              | 1994-98            |
|-------------------------|---------------------|------------------|----------------------|--------------------|
| IBM                     | 4.31**<br>[0.54]    | -0.79*<br>[0.35] | 22.34**<br>[1.79]    | 4.38**<br>[0.44]   |
| log (R&D/Sales)         | -0.6<br>[3.45]      | 5.21+<br>[3.05]  | 4.63*<br>[2.07]      | 8.15**<br>[3.09]   |
| IBM X log (R&D/Sales)   | -80.90**<br>[11.11] | 0.86<br>[5.93]   | -308.86**<br>[22.49] | -58.00**<br>[3.42] |
| log (P&E/Sales)         | -1.23**<br>[0.24]   | -0.74<br>[0.57]  | 1.16<br>[0.75]       | 2.84**<br>[0.97]   |
| Operating income change | -0.18<br>[0.16]     | 0<br>[0.00]      | 0.08**<br>[0.02]     | 0.20*<br>[0.08]    |
| log Sales               | 0.91**<br>[0.04]    | 0.89**<br>[0.09] | 0.81**<br>[0.08]     | 0.79**<br>[0.07]   |
| log Age                 | -0.01<br>[0.27]     | 0.05<br>[0.22]   | -0.18<br>[0.32]      | -0.02<br>[0.25]    |
| R&D not-zero            | 2.51**<br>[0.53]    | 2.24**<br>[0.78] | 2.27**<br>[0.84]     | 6.60**<br>[1.51]   |
| Number of years missing | -0.04<br>[0.03]     | -0.05<br>[0.04]  | -0.27**<br>[0.10]    | 0.03<br>[0.07]     |
| Constant                | -5.27**             | -5.46**          | -4.19**              | -9.54**            |
| Observations            | 307                 | 525              | 550                  | 511                |
| R-squared               | 0.899               | 0.64             | 0.767                | 0.748              |
| Log likelihood          | -3198               | -8763            | -11711               | -20128             |
| N of Clusters           | 87                  | 115              | 114                  | 113                |

Table A3 Notes: Method of estimation is Poisson Pseudo-Maximum-Likelihood (PPML) regression. The dependent variable is the number of successful patent applications for each firm-year. Time-period subsamples are drawn from the larger sample of 115 firms (including IBM), each with annual Compustat records, without gaps, for at least 15 years during 1979-1998 and at least one successful patent application in the USPTO patent classes of IBM patents during the period. 3-year moving averages (for years t, t-1 and t-2) are used for R&D/Sales, Plant & Equipment/Sales and Sales. R&D expenses, Plant and Equipment expenses, and Sales are expressed in Millions of FY2000 Dollars. Employees are in 1000s. Robust standard errors, clustered at the firm-level in brackets; \*\* p<0.01, \* p<0.05, + p<0.1

Table A4. Estimates of patent propensity and others' citations for IBM and other sample firms

|                                  | N of Patents |        | N of Others' Cites |         |
|----------------------------------|--------------|--------|--------------------|---------|
|                                  | Coeff.       | S.E.   | Coeff.             | S.E.    |
| R&D not-zero                     | 4.16**       | [0.97] |                    |         |
| log (R&D/Sales)                  | 7.71**       | [2.37] |                    |         |
| log (P&E/Sales)                  | 0.38         | [0.46] |                    |         |
| IBM                              | -0.12        | [0.29] | -0.12+             | [0.064] |
| log Sales                        | 0.8**        | [0.06] |                    |         |
| log Age                          | -0.06        | [0.18] |                    |         |
| N of years missing               | -0.04        | [0.07] |                    |         |
| IBM X Year 1980                  | -0.04        | [0.03] | -0.03              | [0.07]  |
| IBM X Year 1981                  | 0.11+        | [0.06] | 0.01               | [0.068] |
| IBM X Year 1982                  | -0.01        | [0.06] | 0.07               | [0.066] |
| IBM X Year 1983                  | 0.05         | [0.06] | 0.06               | [0.065] |
| IBM X Year 1984                  | -0.41**      | [0.12] | 0.06               | [0.066] |
| IBM X Year 1985                  | -0.15        | [0.15] | 0.08               | [0.066] |
| IBM X Year 1986                  | -0.13        | [0.21] | 0.05               | [0.066] |
| IBM X Year 1987                  | -0.39**      | [0.14] | 0.11               | [0.065] |
| IBM X Year 1988                  | -0.32*       | [0.16] | 0.1                | [0.065] |
| IBM X Year 1989                  | -0.35+       | [0.18] | 0.14*              | [0.064] |
| IBM X Year 1990                  | -0.15        | [0.2]  | 0.12+              | [0.065] |
| IBM X Year 1991                  | 0.18         | [0.2]  | 0.04               | [0.065] |
| IBM X Year 1992                  | 0.38+        | [0.23] | 0.01               | [0.065] |
| IBM X Year 1993                  | 0.35         | [0.24] | 0.11               | [0.065] |
| IBM X Year 1994                  | 0.65**       | [0.24] | 0.05               | [0.066] |
| IBM X Year 1995                  | 0.79**       | [0.23] | 0.03               | [0.067] |
| IBM X Year 1996                  | 0.8**        | [0.23] | 0.11               | [0.068] |
| IBM X Year 1997                  | 0.87**       | [0.23] | 0.11               | [0.068] |
| IBM X Year 1998                  | 0.93**       | [0.24] | 0.02               | [0.07]  |
| SCITES                           |              |        | -0.07**            | [0.014] |
| SCITES X IBM                     |              |        | 0.1**              | [0.02]  |
| Constant                         | -6.89**      | [1.24] | -0.05              | [0.127] |
| N of Observations                | 2,009        |        | 273,882            |         |
| N of Clusters (Firms or Patents) | 115          |        | 43,722             |         |
| R-Squared                        | 0.758        |        | 0.072              |         |
| Log-likelihood                   | -52061       |        | -449209            |         |
| Year FE                          | Y            |        | Y                  |         |
| Class FE                         | N            |        | Y                  |         |

Table A4 Notes: Method of estimation is Poisson Pseudo-Maximum-Likelihood (PPML) regression. The dependent variables are the number of successful patent applications for each firm-year and the number of others' annual citations to patent. See notes for Table 2 for additional details. Robust standard errors, clustered at the firm-level or patent-level in brackets; \*\* p<0.01, \* p<0.05, + p<0.1

Table A5: Estimates of patent propensity and market value for sample firms, 1979-1998

| Column #                | 1                 | 2                 | 3                 | 4                 |
|-------------------------|-------------------|-------------------|-------------------|-------------------|
| Specification           | Poisson, RE       | Poisson, FE       | LS, RE            | LS, FE            |
| D.V.=                   | N of Patents      | N of Patents      | Tobin's Q         | Tobin's Q         |
| TREATED                 | 0.02<br>[0.61]    |                   | 0.60*<br>[0.30]   |                   |
| TREATED_AFTER           | 0.96**<br>[0.02]  | 0.96**<br>[0.02]  | -0.91+<br>[0.52]  | -1.13*<br>[0.52]  |
| log PAT                 |                   |                   | -0.03+<br>[0.02]  | -0.06**<br>[0.02] |
| TREATED X log PAT       |                   |                   | -0.07<br>[0.05]   | 0.03<br>[0.06]    |
| TREATED_AFTER X log PAT |                   |                   | 0.20*<br>[0.08]   | 0.22**<br>[0.08]  |
| R&D not-zero            | -1.13**<br>[0.19] | -0.3<br>[0.23]    | 0.04<br>[0.10]    | 0.12<br>[0.10]    |
| log (R&D/Sales)         | 3.43**<br>[0.22]  | 3.46**<br>[0.22]  | 0.71<br>[0.53]    | -0.81<br>[0.65]   |
| log (P&E/Sales)         | -0.15**<br>[0.03] | -0.16**<br>[0.03] | -1.25**<br>[0.16] | -1.69**<br>[0.20] |
| log Sales               | 0.97**<br>[0.01]  | 0.98**<br>[0.01]  | 0.04*<br>[0.02]   | -0.09**<br>[0.03] |
| log Age                 | -0.12**<br>[0.01] | -0.12**<br>[0.01] | -0.14**<br>[0.03] | -0.07+<br>[0.04]  |
| N of years missing      | -0.36**<br>[0.05] |                   | 0.01<br>[0.02]    |                   |
| Constant                |                   |                   | 0.79              | 1.51              |
| N of Observations       | 1,989             | 1,989             | 1,989             | 1,989             |
| N of Firms              | 114               | 114               | 114               | 114               |
| Year FE                 | Y                 | Y                 | Y                 | Y                 |
| Firm RE                 | Y                 |                   | Y                 |                   |
| Firm FE                 |                   | Y                 |                   | Y                 |
| Log likelihood          | -12914            | -12181            |                   |                   |
| Chi2                    | 34436             | 34362             |                   |                   |
| p value                 | 0                 | 0                 |                   |                   |
| R-squared, within       |                   |                   |                   | 0.221             |
| R-squared, overall      |                   |                   | 0.205             |                   |

Table A5 Notes: Method of estimation is Maximum Likelihood Poisson for estimates in Columns (1) and (2) and Least Squares (LS) for estimates in Columns (3) and (4). The dependent variable is the number of successful patent applications for each firm-year in (1) and (2) and log of Tobin's Q in (3) and (4). Sample is composed of 114 firms, each with annual Compustat records, without gaps, for at least 15 years during 1979-1998 and at least one successful patent application in the USPTO patent classes of IBM patents during the period. 3-year moving averages (for years  $t$ ,  $t-1$  and  $t-2$ ) are used for R&D/Sales, Plant & Equipment/Sales and Sales. R&D expenses, Plant and Equipment expenses, and Sales are expressed in Millions of FY2000 Dollars. Employees are in 1000s. Robust standard errors, clustered at the firm-level in brackets; \*\*  $p < 0.01$ , \*  $p < 0.05$ , +  $p < 0.1$
